# Supplementary material
Source: PubMed Central journal article supplement (PMC4731168)
Supplement: JCI80937.sd.pdf [file JCI80937.sd.pdf]

# **TGF- $\beta$ -SPTBN1-CTCF-regulated tumor suppression in Beckwith-Wiedemann syndrome, a human stem cell disorder**

Jian Chen, Zhi-Xing Yao, Jiun-Sheng Chen, Young Jin Gi, Nina M. Muñoz, Suchin Kundra, H. Franklin Herlong, Yun Seong Jeong, Alexei Goltsov, Kazufumi Ohshiro, Nipun A. Mistry, Jianping Zhang, Xiaoping Su, Sanaa Choufani, Abhisek Mitra, Shulin Li, Bibhuti Mishra, Jon White, Asif Rashid, Alan Yaoqi Wang, Milind Javle, Marta Davila, Peter Michaely, Rosanna Weksberg, Wayne L. Hofstetter, Milton J Finegold, Jerry W. Shay, Keigo Machida, Hidekazu Tsukamoto, and Lopa Mishra

Correspondence to:

Lopa Mishra, MD  
Director, Center for Translational Research  
Department of Surgery and GW Cancer Center,  
George Washington University, 2150 Pennsylvania  
Avenue, NW, Washington, DC 20037  
& The Del & Dennis McCarthy Distinguished Professor  
in Gastrointestinal Cancer Research, Department of  
Gastroenterology, Hepatology, and Nutrition – Unit 1466  
The University of Texas MD Anderson Cancer Center  
1515 Holcombe Boulevard, Houston, TX 77030  
lmishra@mdanderson.org, lmishra@GWU.edu  
Tel: 240-401-2916, 202-741-3225

## **Supplemental Materials and Methods**

### **Whole-transcriptome Sequencing Analysis.**

Whole-transcriptome RNA sequencing were performed and analyzed at the MD Anderson Cancer Center DNA core facility. We generated a standard bam file by aligning the raw paired-end reads in FASTQ format to the human reference genome, GRCh37/hg19, using MOSAIK alignment software (1). We then counted the uniquely mapped reads in genomic features such as genes annotated in refSeq to generate the raw counts for each gene, where raw reads count data were subsequently normalized across samples using DESeq with variance stabilization (2).

### **Database analyses.**

Affymetrix mRNA microarray data GSE3228 were downloaded from NCBI's Gene Expression Omnibus (GEO). *Smad3*<sup>-/-</sup> primary keratinocytes were derived from *Smad3* null mice. The transcriptome data of two independent *Smad3*<sup>-/-</sup> keratinocytes were downloaded and further normalized with wild type mouse keratinocytes. Most of the decreased TGF- $\beta$ /Smad3-regulated genes presented on Figure 2A are validated by IPA analysis (cutoff: adjusted *P* value < 0.05) in *Smad3*<sup>-/-</sup> primary keratinocytes. The information about somatic mutations in *SPTBN1* and *SMAD3* reported in the Catalogue of Somatic Mutations in Cancer and The Cancer Genome Atlas (TCGA) liver cancers was downloaded in May 2014 (Supplemental Table 3).

### **Preparation of Nuclear and Cytoplasmic Proteins.**

Nuclear and cytoplasmic proteins were prepared as previously described (3). Briefly, the cells were harvested and incubated in buffer A (10 mmol/L Hepes, pH 7.8, 10 mmol/L KCl, 0.1 mmol/L EDTA, 1 mmol/L dithiothreitol, 2 mg/ml aprotinin, 0.5 mmol/L phenylmethyl sulfonyl fluoride, and 0.5% Triton X-100). After centrifugation at 5000 rpm, buffer A was collected,

including cytoplasmic proteins, as the cytoplasmic protein sample. Buffer C (50 mmol/L Hepes, pH 7.8, 420 mmol/L KCl, 0.1 mmol/L EDTA, 5 mmol/L MgCl<sub>2</sub>, 10% glycerol, 1 mmol/L dithiothreitol, 2 mg/ml aprotinin, and 0.5 mmol/L phenylmethyl sulfonyl fluoride) was added to the pellet. After rotation for 30 minutes and centrifugation at 15,000 rpm, supernatants were collected as the nuclear protein sample. Then, lysates were immunoprecipitated with the indicated antibodies. The following antibodies were used for immunoblotting and immunoprecipitation analyses: V5 antibody (R961-25, Invitrogen), Flag M2 antibody (Sigma Aldrich, F3165), His antibody (2366, Cell Signaling), Actin antibody (A2066, Sigma Aldrich), Tubulin antibody (T8328, Sigma Aldrich), c-Myc antibody (sc-40, Santa Cruz Biotechnology), CTCF antibody (2899, Cell Signaling), Smad3 antibody (9523, Cell Signaling), phosphor-Smad3 antibody (Ser423/425, 9520, Cell Signaling), Smad2 antibody (3122, Cell Signaling), phosphor-Smad2 antibody (Ser465/467, 8828, Cell Signaling),  $\beta$ 2SP antibody (customized antibody from bioSythesis).

#### **Primers for Quantitative RT-PCR Analyses and ChIP Assays.**

The sequences used for quantitative RT-PCR analysis were as follows:

*hTERT*, forward 5'-AAATGCGGCCCCCTGTTTCT-3'; reverse 5'-CAGTGCGTCTTGAGGAGCA-3'. *mTERT*, forward 5'-TCTACCGCACTTTGGTTGCC-3'; reverse 5'-CAGCACGTTTCTCTCGTTGC-3'. *IGF2*, forward 5'-GTGGCATCGTTGAGGAGTG-3'; reverse 5'-CACGTCCCTCTCGGACTTG-3'. *CTCF*, forward 5'-CAGTGGAGAATTGGTTCGGCAT-3'; reverse 5'-CTGGCGTAATCGCACATGGA-3'. *Smad3*, forward 5'-TGGACGCAGGTTCTCCAAAC-3'; reverse 5'-CCGGCTCGCAGTAGGTAAC-3'. *m HEY1*, forward 5'-CCGACGAGACCGAATCAATAAC-3'; reverse 5'-TCAGGTGATCCACAGTCATCTG-3'.

*mESR1*, forward 5' - CCCGCCTTCTACAGGTCTAAT-3'; reverse 5' -  
 CTTTCTCGTTACTGCTGGACAG-3'. *mRunx3*, forward 5' -  
 GACTCCTTCCCCAACTATACACC-3'; reverse 5' - CGCTGTTCTCGCCCATCTT-3'.  
*mSLC1A2*, forward 5' - GCCAACAATATGCCCAAGCAG-3'; reverse 5' -  
 GACACCAAACACAGTCAGTGA-3'. *hRUNX1*, forward 5' - CTGCCCATCGCTTTCAAGGT-  
 3'; reverse 5' - GCCGAGTAGTTTTTCATCATTGCC-3'. *hCDKN1A*, forward 5' -  
 TGTCCGTCAGAACCCATGC-3'; reverse 5' - AAAGTCGAAGTTCCATCGCTC-3'.  
*hCDKN1B*, forward 5' - AACGTGCGAGTGTCTAACGG-3'; reverse 5' -  
 CCCTCTAGGGGTTTGTGATTCT-3'. *hSERPINE1*, forward 5' -  
 ACCGCAACGTGGTTTTCTCA-3'; reverse 5' - TTGAATCCCATAGCTGCTTGAAT-3'.  
*hIRF7*, forward 5' - GCTGGACGTGACCATCATGTA-3'; reverse 5' -  
 GGGCCGTATAGGAACGTGC-3'. *hFOS*, forward 5' - CCGGGGATAGCCTCTCTTACT-3';  
 reverse 5' - CCAGGTCCGTGCAGAAGTC-3'. *hTGIF1*, forward 5' -  
 GGGATTGGCTGTATGAGCACC-3'; reverse 5' - GGCGGGAAATTGTGAACTGA-3'.  
*hMMP9*, forward 5' - TGTACCGCTATGGTTACACTCG-3'; reverse 5' -  
 GGCAGGGACAGTTGCTTCT-3'.  
*hMYC*, forward 5' - GGCTCCTGGCAAAAGGTCA -3'; reverse 5' -  
 CTGCGTAGTTGTGCTGATGT-3'.  
*Gapdh*, forward 5' - TGCACCACCAACTGCTTAGC-3';  
*Gapdh*, reverse 5' - GTCTTCTGGGTGGCAGTGATG-3'.  
*hALB*, forward 5' - TGCAACTCTTCGTGAAACCTATG-3';  
*hALB*, reverse 5' - ACATCAACCTCTGGTCTCACC-3';  
*mALB*, forward 5' - CAAGAGTGAGATCGCCCATCG-3';

*mALB*, reverse 5'-TTACTTCCTGCACTAATTTGGCA-3';  
*hKRT19*, forward 5'-AACGGCGAGCTAGAGGTGA-3';  
*hKRT19*, reverse 5'-GGATGGTCGTGTAGTAGTGGC-3';  
*mKRT19*, forward 5'-GTTTCAGTACGCATTGGGTCAG-3';  
*mKRT19*, reverse 5'-GAGGACGAGGTCACGAAGC-3';  
*hPROM1(CD133)*, forward 5'-AGTCGGAAACTGGCAGATAGC-3';  
*hPROM1(CD133)*, reverse 5'-GGTAGTGTTGTACTGGGCCAAT-3';  
*mPROM1(CD133)*, forward 5'-ACTGGGGCTGTGTGGAAAG-3';  
*mPROM1(CD133)*, reverse 5'-GCATTGAAGGTATCTTGGGTCTC-3';  
*hNANOG*, forward 5'-TTTGTGGGCCTGAAGAAAAC-3';  
*hNANOG*, reverse 5'-AGGGCTGTCCTGAATAAGCAG-3';  
*mNANOG*, forward 5'-CACAGTTTGCCTAGTTCTGAGG-3';  
*mNANOG*, reverse 5'-GCAAGAATAGTTCTCGGGATGAA-3';  
*hPOU5F1(OCT4)*, forward 5'-CTGGGTTGATCCTCGGACCT-3';  
*hPOU5F1(OCT4)*, reverse 5'-CCATCGGAGTTGCTCTCCA-3';  
*mPOU5F1(OCT4)*, forward 5'-AGAGGATCACCTTGGGGTACA-3';  
*mPOU5F1(OCT4)*, reverse 5'-CGAAGCGACAGATGGTGGTC-3';  
*hSOX2*, forward 5'-GCCGAGTGGAACCTTTTGTCG-3';  
*hSOX2*, reverse 5'-GGCAGCGTGTACTTATCCTTCT-3';  
*mSOX2*, forward 5'-GCGGAGTGGAACCTTTTGTC-3';  
*mSOX2*, reverse 5'-GGGAAGCGTGTACTTATCCTTCT-3';  
*hEPCAM*, forward 5'-AATCGTCAATGCCAGTGTACTT-3';  
*hEPCAM*, reverse 5'-TCTCATCGCAGTCAGGATCATAA-3';

*mEPCAM*, forward 5'-CTGGCGTCTAAATGCTTGGC-3';

*mEPCAM*, reverse 5'-CCTTGTCGGTTCTTCGGACTC-3';

*hAFP*, forward 5'-CTTTGGGCTGCTCGCTATGA-3';

*hAFP*, reverse 5'-GCATGTTGATTTAACAAGCTGCT-3';

*mAFP*, forward 5'-AGCTTCCACGTTAGATTCCTCC-3';

*mAFP*, reverse 5'-ACAAACTGGGTAAAGGTGATGG-3';

The sequences used for ChIP assays were as follows (Supplementary Figure S10):

hTERT ChIP-1-F: CTCTGCAGTCCGAGGCTTG; hTERT ChIP-1-R:

CCCGTCATTTCTCTTTGCAG. hTERT ChIP-2-F: CCGGACCTGGAGGCAGCC; hTERT

ChIP-2-R: CCCCAGCGGAGAGAGGTC. hTERT ChIP-3-F: ACCTCTCTCCGCTGGGGC;

hTERT ChIP-3-R: CGTCTGTGCCCCGCGAATC. hTERT ChIP-4-F:

GGACCGCGCTTCCCACGT; hTERT ChIP-4-R: AGGAAGGGGAGGGGCTGG. hTERT

ChIP-5-F: AGCCCCTCCCCTTCCTTTCC;

hTERT ChIP-5-R: AGCGCACGGCTCGGCAGC. hTERT ChIP-6-F:

AGCCGTGCGCTCCCTGCT; hTERT ChIP-6-R: GCACGCACACCAGGCACT. mTERT

ChIP-1-F: AAATTCAGCAGCCCCTCTCT; mTERT ChIP-1-R:

TCTCAACTCACGCACCCATA. mTERT ChIP-2-F: ATGGTCGCACCACAATAAAG;

mTERT ChIP-2-R: GGGCAAGCAAAGAAGCCTAT. mTERT ChIP-3-F:

GGATAGGCTTCTTTGCTTGC; mTERT ChIP-3-R: TTGATGGTCACAATGCTGGT.

mTERT ChIP-4-F: TTCGTCGTGGACTCTCAGTG; mTERT ChIP-4-R:

GCCACACCTCCCGGTATC. mH19-ICR ChIP-4-F: TCATGGGTCACTCAGGCATA;

mH19-ICR ChIP-4-R: CGTCTGCCGAGCAATATGTA. hPAI-1 ChIP-F:

GTCCTAGGCTTTTTGGGTCA; hPAI-1 ChIP-R: ACAATTGAGCAAACCCCAAT. mPAI-1

Chip-F: AGGGAACCAGAGTTTGCTCA; mPAI-1 Chip-R: GCCCCACCCACTTTCTAACT.

### **Supplemental References**

1. Anders S & Huber W (2010) Differential expression analysis for sequence count data. *Genome Biol* 11(10):R106.
2. Marth GT, *et al.* (1999) A general approach to single-nucleotide polymorphism discovery. *Nature genetics* 23(4):452-456.
3. Chen J, *et al.* (2009) Hypoxia-mediated up-regulation of Pim-1 contributes to solid tumor formation. *The American journal of pathology* 175(1):400-411.

**A**

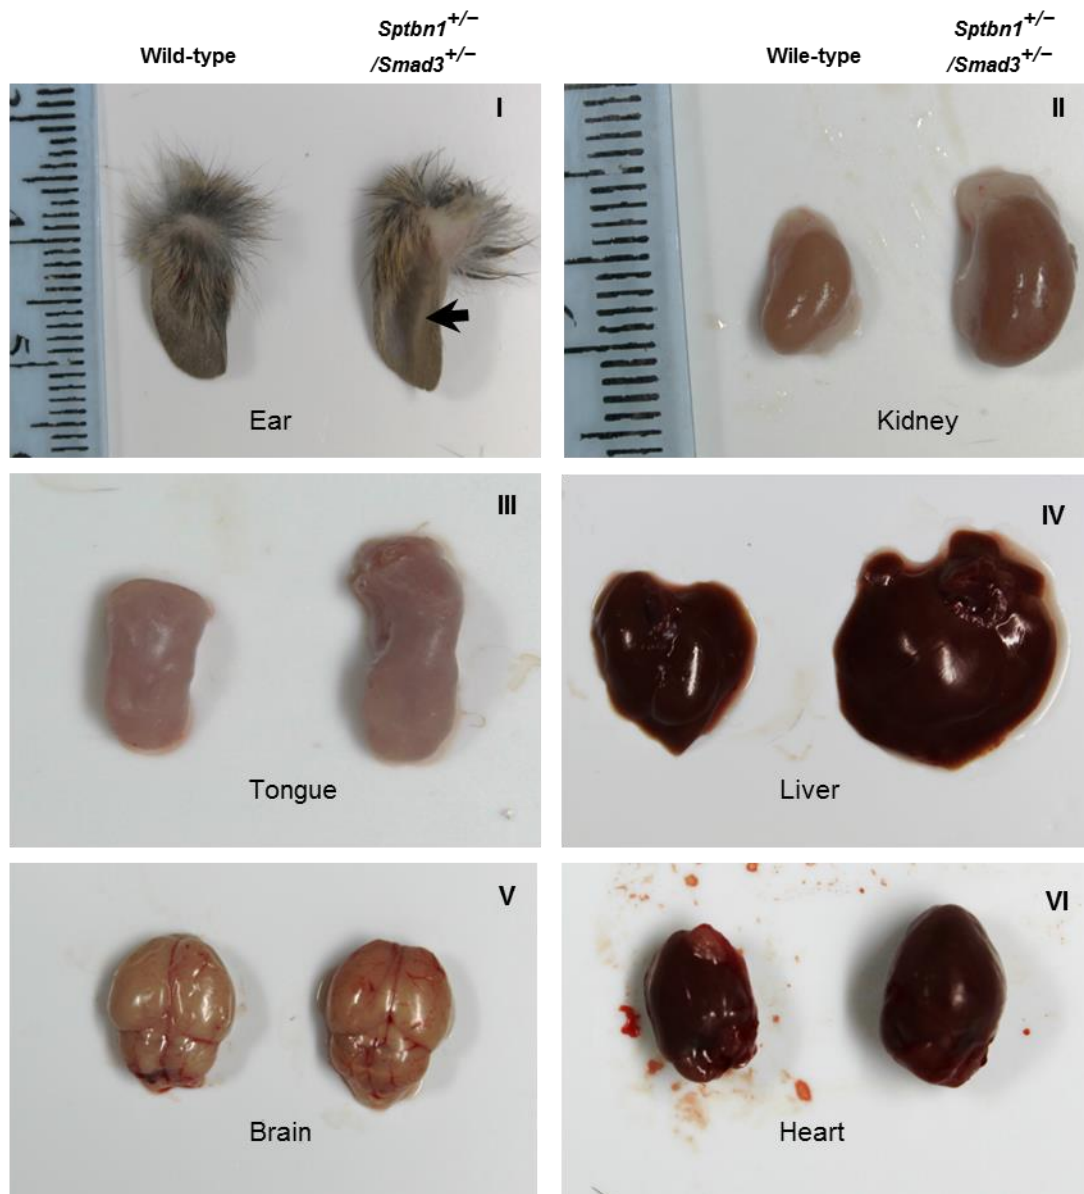

**Supplemental Figure1. *Sptbn1*<sup>+/-</sup>/*Smad3*<sup>+/-</sup> mice phenocopy BWS.** Representative enlargement of organs in *Sptbn1*<sup>+/-</sup>/*Smad3*<sup>+/-</sup> mice. I: ears; II: kidneys; III: Tongues; IV: livers; V: brains; VI: hearts. The arrow indicates an anterior linear ear lobe crease.

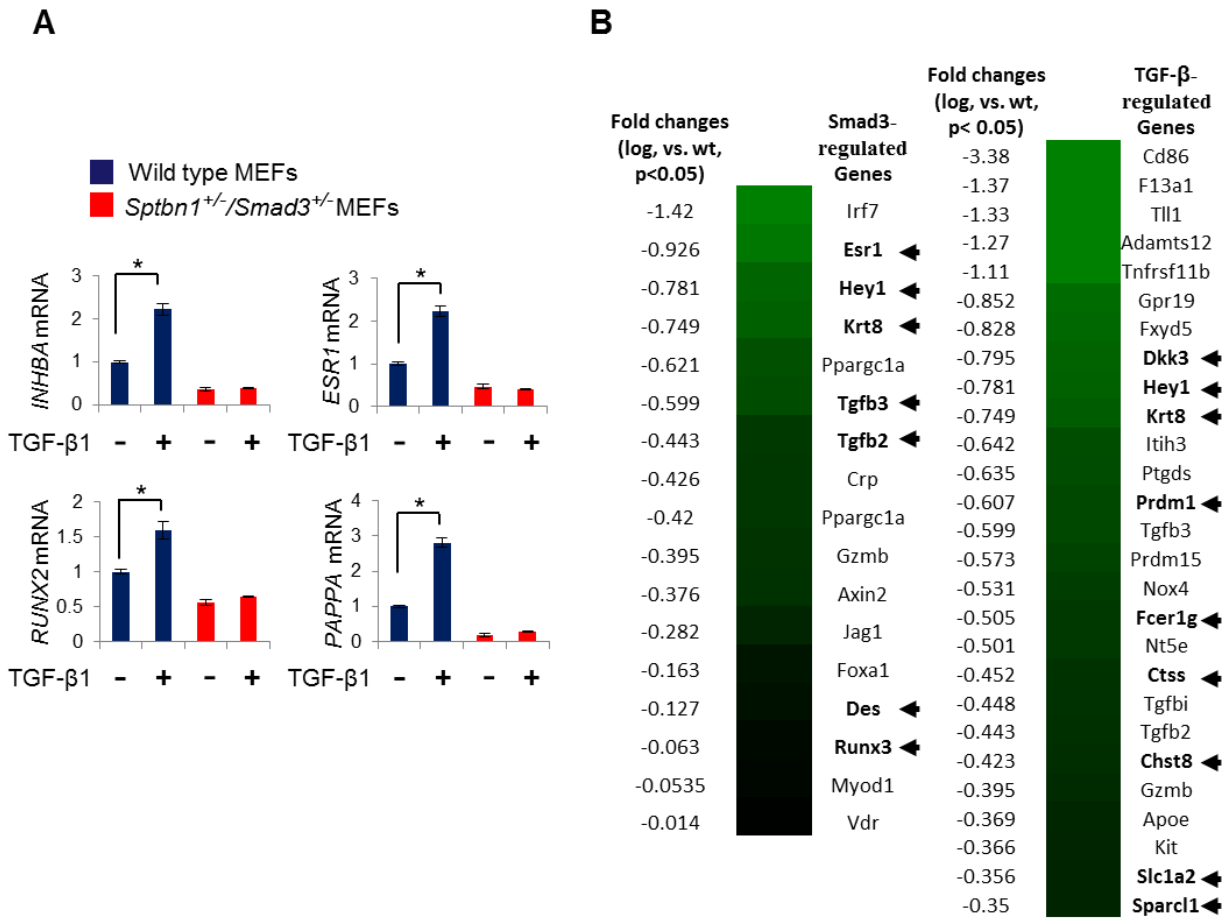

**Supplemental Figure 2. Validation of TGF-β pathway disruption in *Smad3*<sup>-/-</sup> primary keratinocytes.** (A) Q-PCR analysis of defective TGF-β response in *Sptbn1*<sup>+/-</sup>/*Smad3*<sup>+/-</sup> MEFs (n=2). Error bars are shown as standard deviations. Each result shown is representative of three independent experiments. \*: *P* < 0.01, Student's t-test. (B) The transcriptome data of two independent *Smad3*<sup>-/-</sup> keratinocytes were downloaded from NCBI's Gene Expression Omnibus (GEO) cohort GSE3228, and further normalized with wild type mouse keratinocytes and then analyzed by IPA. TGF-β/Smad3-regulated genes are detected by fold change cutoff (*P* < 0.05) and presented on heat map.

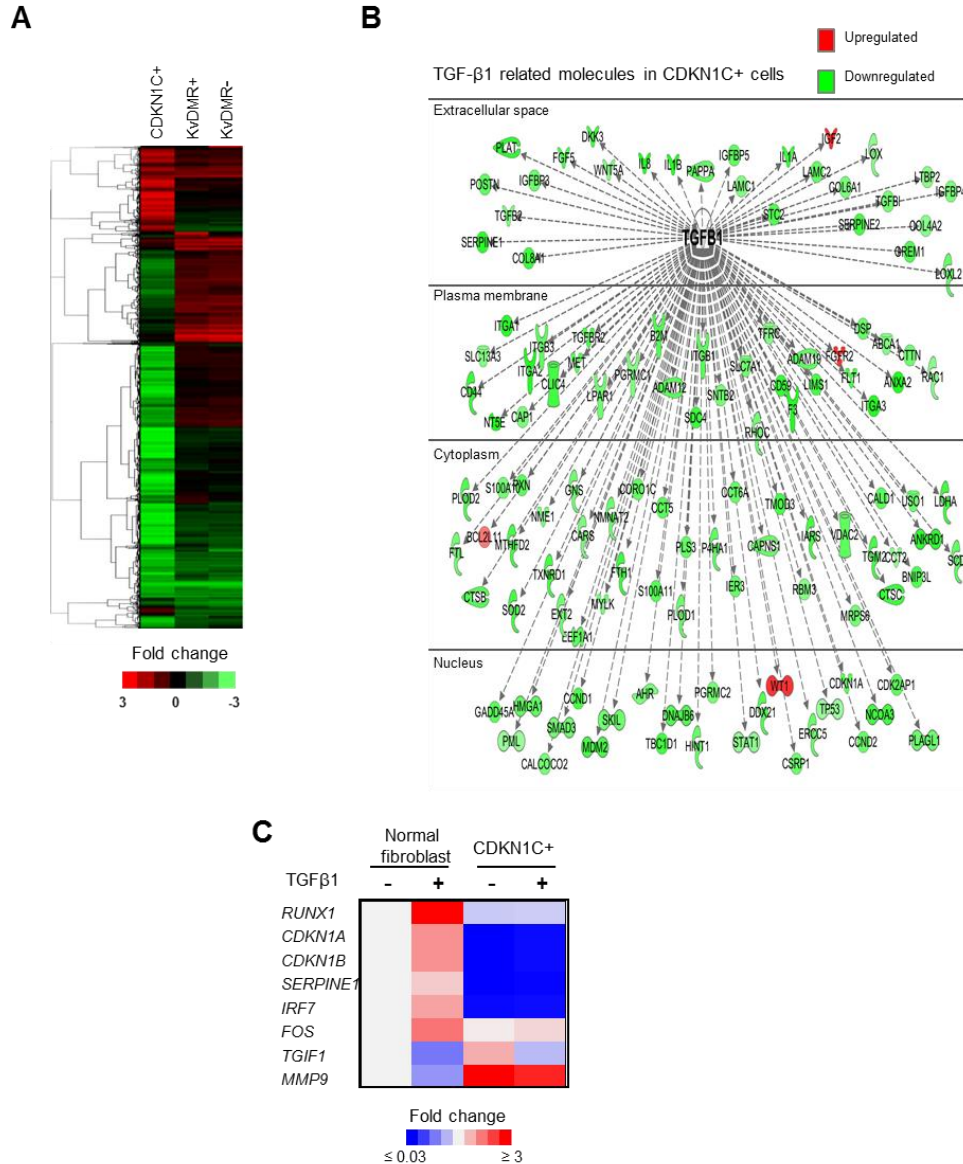

**Supplemental Figure 3. Analyses of whole-transcriptome sequencing of three BWS cell lines.** (A) The differential gene expressions in three BWS cells were compared to the gene expression in a fibroblast cell line established from a normal person by fold change (significance cutoff,  $P$  value < 0.05). (B) Downregulation of the TGF- $\beta$  pathway in CDKN1C+ BWS cells. The differential gene expression in CDKN1C+ BWS cells was compared to the gene expression in a fibroblast cell line established from normal person and then detected by fold change (cutoff,  $q$  value < 0.3). These data were uploaded to the IPA program. The diagram lists all the TGF- $\beta$ 1-related genes in the input dataset. Red indicates upregulated and green indicates downregulated genes. The arrows point to validated TGF- $\beta$ /Smad3-regulated genes. (C) Q-PCR analysis validated a defective TGF- $\beta$  response in CDKN1C+ cells. Normal fibroblast and BWS CDKN1C+ cells were treated with TGF- $\beta$ 1 for 2 hours. Q-PCR was performed to detect TGF- $\beta$  target gene expression. The result shown is representative of three independent experiments.

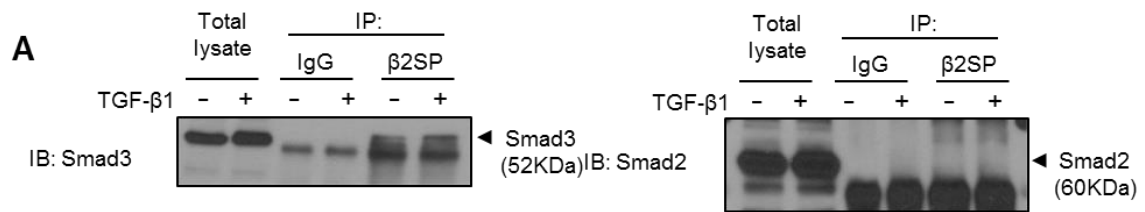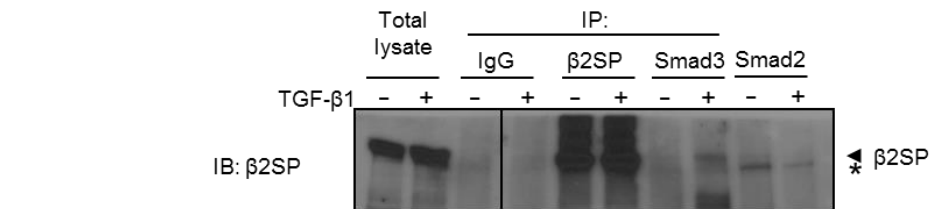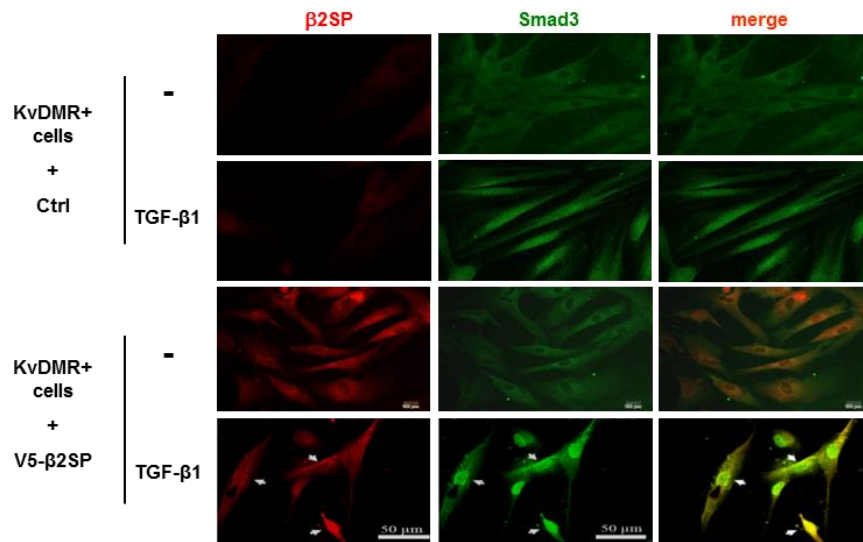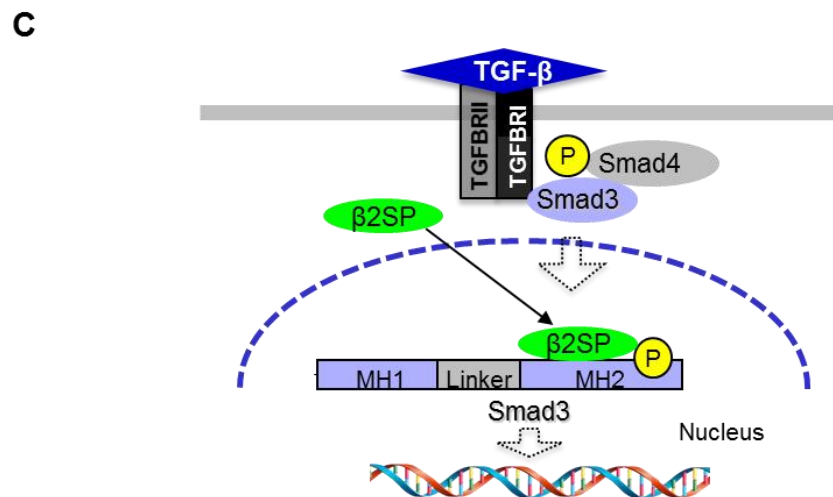

**Supplemental Figure 4.  $\beta$ 2SP interacts with SMAD3.** (A)  $\beta$ 2SP interacts with SMAD3, but not with SMAD2. HepG2 cells were treated with 200 pM TGF- $\beta$  for 2 h. Cell lysates were immunoprecipitated with an anti-Smad3 antibody, an anti-Smad2 antibody or anti- $\beta$ 2SP antibody, and immunoblotted with indicated antibodies. \* designates non-specific bands. (B) Overexpression of  $\beta$ 2SP rescues SMAD3 nuclear translocation in BWS cells. BWS KvDMR+ cells were transfected with full-length V5- $\beta$ 2SP for 24 hours and then were treated with 200 pM TGF- $\beta$ 1 for 2 hours. Immunofluorescent staining was performed to detect  $\beta$ 2SP and Smad3. Scale bars = 50  $\mu$ m. Representative confocal images are shown. Data are representative of two independent experiments (A–B). (C) Proposed model of the role of  $\beta$ 2SP required for Smad3 nuclear translocation in response to TGF- $\beta$ .

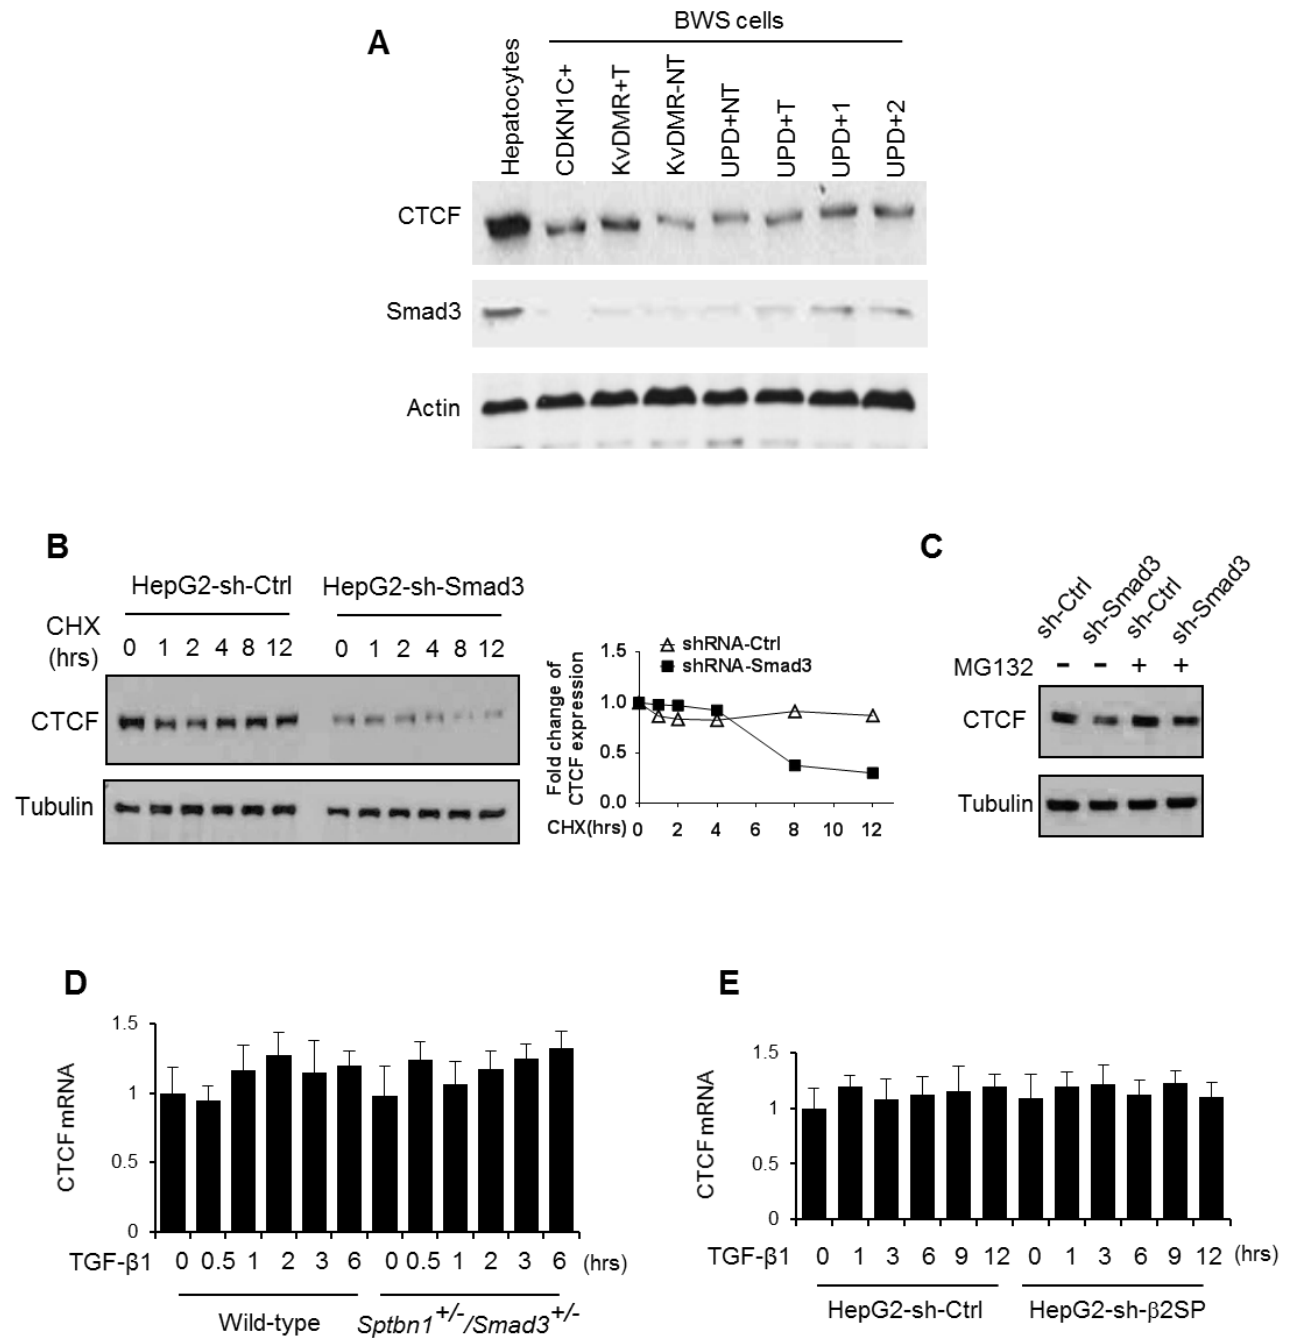

**Supplemental Figure 5. TGF- $\beta$ /Smad3/ $\beta$ 2SP regulates CTCF levels posttranscriptionally.**

(A) Lower CTCF levels in BWS cells compared with normal hepatocytes. CTCF levels were detected by immunoblotting analysis. Seven human BWS cell lines were developed by Dr. Weksberg (Ontario, Canada). CDKN1C+: CDKN1C mutation, no tumor; KvDMR-: loss of methylation in KCNQ1OT1, no tumor; KvDMR+: loss of methylation in KCNQ1OT1, hepatoblastoma; UPD+NT: uniparental disomy, no tumor; UPD+T: uniparental disomy, hepatoblastoma; UPD+1: uniparental disomy, tongue tissue 1; UPD+2: uniparental disomy, tongue tissue 2. UPD+1 and UPD+2 cell lines were derived from the same case with biopsies at separate sites. KvDMR- and KvDMR+ were derived from normal monozygotic twin (absence of KvDMR molecular defect but it had some clinical signs of BWS) and BWS monozygotic twin with KvDMR molecular defect, respectively. Normal human hepatocytes were received from the Liver Tissue Cell Distribution System, University of Pittsburgh and University of Minnesota. (B) Knock down Smad3 decreased CTCF protein stability. HepG2-sh-Ctrl or HepG2-sh-Smad3 cells were treated with cycloheximide (CHX; 100  $\mu$ g/ml) for the indicated times. The density of CTCF and the integrated optical density were measured. The turnover of CTCF is indicated graphically. (C) Smad3-mediated CTCF downregulation was proteasome-dependent. HepG2-sh-Ctrl or HepG2-sh-Smad3 cells were treated with or without 50  $\mu$ g/ml of MG132 for 6 hours. The cell lysates were then immunoblotted with the indicated antibodies. All blots are representative of experiments performed 3 times (A–C). (D, E) CTCF mRNA level was not affected by TGF- $\beta$ 1 treatment in MEFs (D) or HepG2 cells (E). The *Sptbn1*<sup>+/-</sup>/*Smad3*<sup>+/-</sup> MEFs (D) or  $\beta$ 2SP-knockdown HepG2 cells (E) were treated with 200 pM TGF- $\beta$ 1 for the indicated times. Q-PCR was performed to detect CTCF mRNA expression. (n=3). Each blot is representative of three independent experiments (A, B, D & E), 2(C).

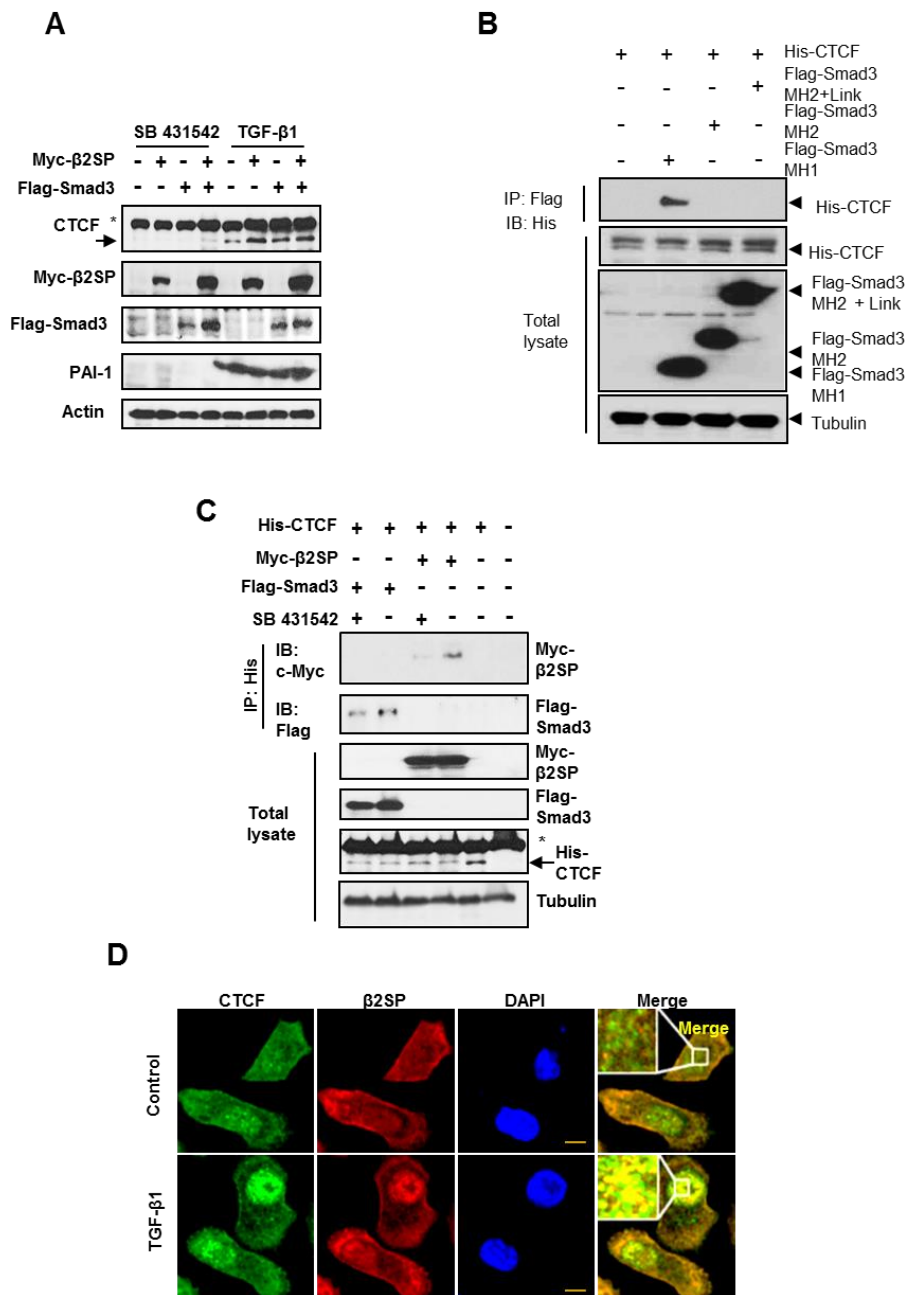

**Supplemental Figure 6.  $\beta$ 2SP/Smad3 interact with CTCF in cell nucleus.** (A)  $\beta$ 2SP and/or Smad3 increased CTCF levels in a TGF- $\beta$ -dependent manner. HepG2 cells were co-transfected with the indicated plasmids and were treated with TBR1 inhibitor SB431542 (5  $\mu$ M) overnight or with TGF- $\beta$ 1 (200 pM) for 2 h. (B) CTCF interacts with Smad3 MH1 domain. SNU398 cells were co-transfected with indicated plasmids. Cell lysates were immunoprecipitated with an anti-His antibody and immunoblotted with indicated antibodies. (C) Interaction of  $\beta$ 2SP/Smad3 with CTCF is TGF- $\beta$  dependent. SNU398 cells were co-transfected with the indicated plasmids and were treated with 5  $\mu$ M SB431542 overnight. Cell lysates were immunoprecipitated with an anti-histidine antibody and immunoblotted with indicated antibodies. Each blot is representative of two independent experiments (A–C). (D) Nuclear translocation of  $\beta$ 2SP and CTCF upon treatment of TGF- $\beta$ . SNU475 cells were treated with 200 pM TGF- $\beta$ 1 for 2 h. Immunofluorescent staining was performed to detect  $\beta$ 2SP and CTCF. Scale bars, 20  $\mu$ m.

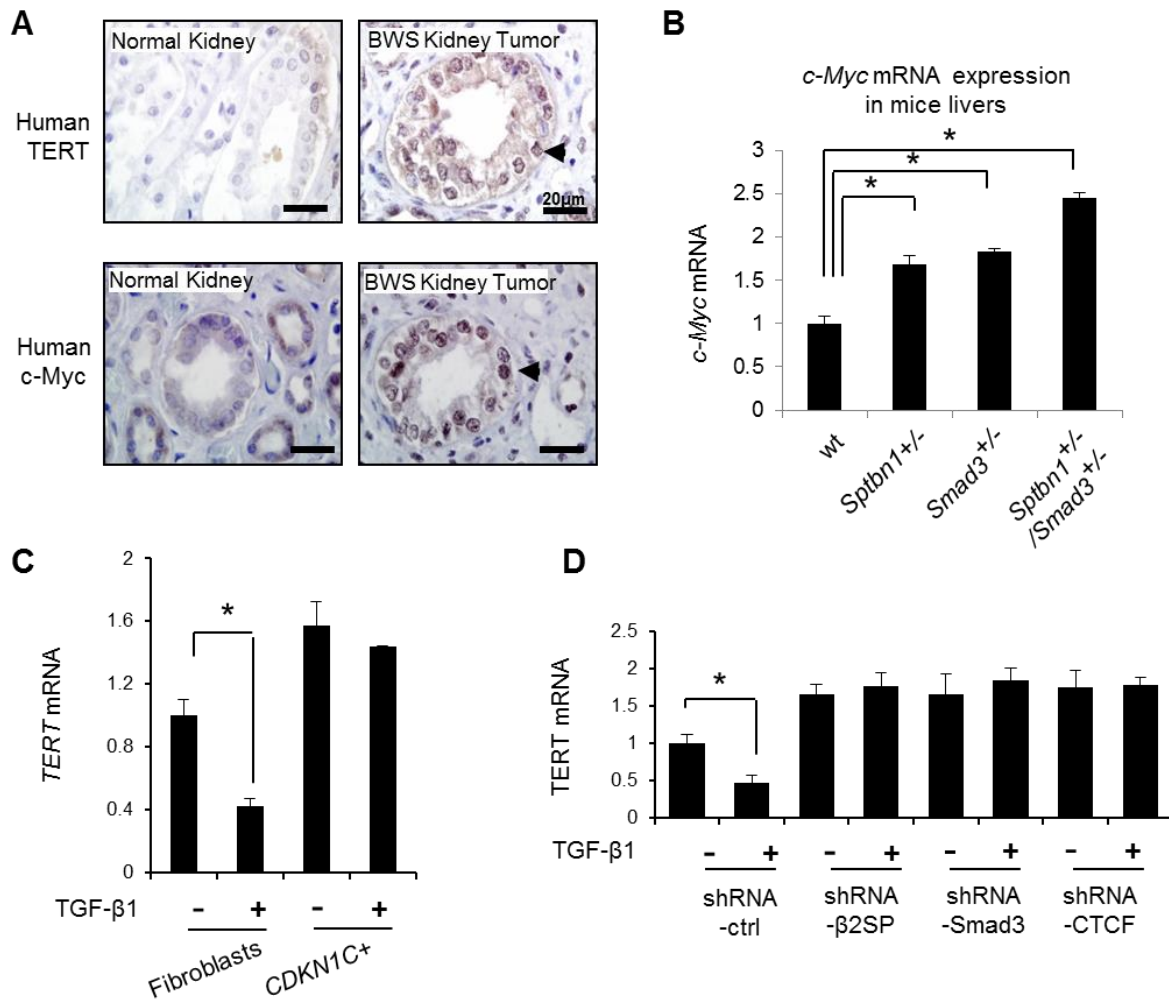

**Supplemental Figure 7. The expression of *TERT*, *c-Myc* and *IGF2* are increased in human BWS-associated tumors, *TGF-β* defective mouse livers and cell lines established from individual tumors in *Sptbn1*<sup>+/-</sup>/*Smad3*<sup>+/-</sup> mice. (A) Increased levels of TERT and c-Myc in kidney tumors of BWS patients were observed. Representative immunohistochemical staining of human TERT and c-Myc in normal kidney or in kidney tumors of BWS patients. (B) Increased mRNA expressions of *c-Myc* in *Sptbn1*<sup>+/-</sup>/*Smad3*<sup>+/-</sup>, *Smad3*<sup>+/-</sup>, and *Sptbn1*<sup>+/-</sup> mouse livers. (C) Reduction of TGF-β-induced *TERT* expression levels were observed in human normal fibroblasts but not CDKN1C<sup>+</sup> BWS cells. The cells were treated with 200 pM TGF-β for 2 h. (D) The *TERT* mRNA level was increased in β2SP, Smad3 or CTCF knockdown cells compared with control cells. The cells were treated with 200 pM TGF-β for 2 h. Error bars are shown as standard deviations. Each result shown is representative of three independent experiments (B–D). \*: *P* < 0.001, one-way ANOVA with post-hoc Bonferroni test**

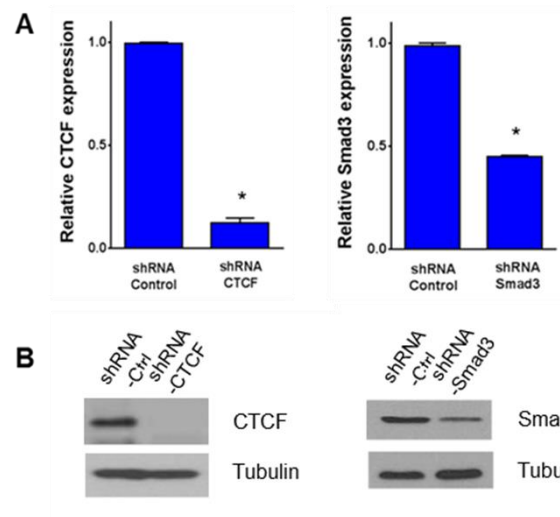

**Supplemental Figure 8. Knock down CTCF or Smad3 in SNU398 cells.** SNU398 cells were infected with lentivirus-mediated CTCF-shRNA, Smad3-shRNA or control-shRNA. **(A)** Q-PCR and **(B)** Western blot analyses were performed to detect the expression of CTCF and Smad3 in SNU398 cells. Results are the average of three independent experiments and are presented as mean  $\pm$  SD in (A). \*:  $P < 0.01$ , Student's t-test.

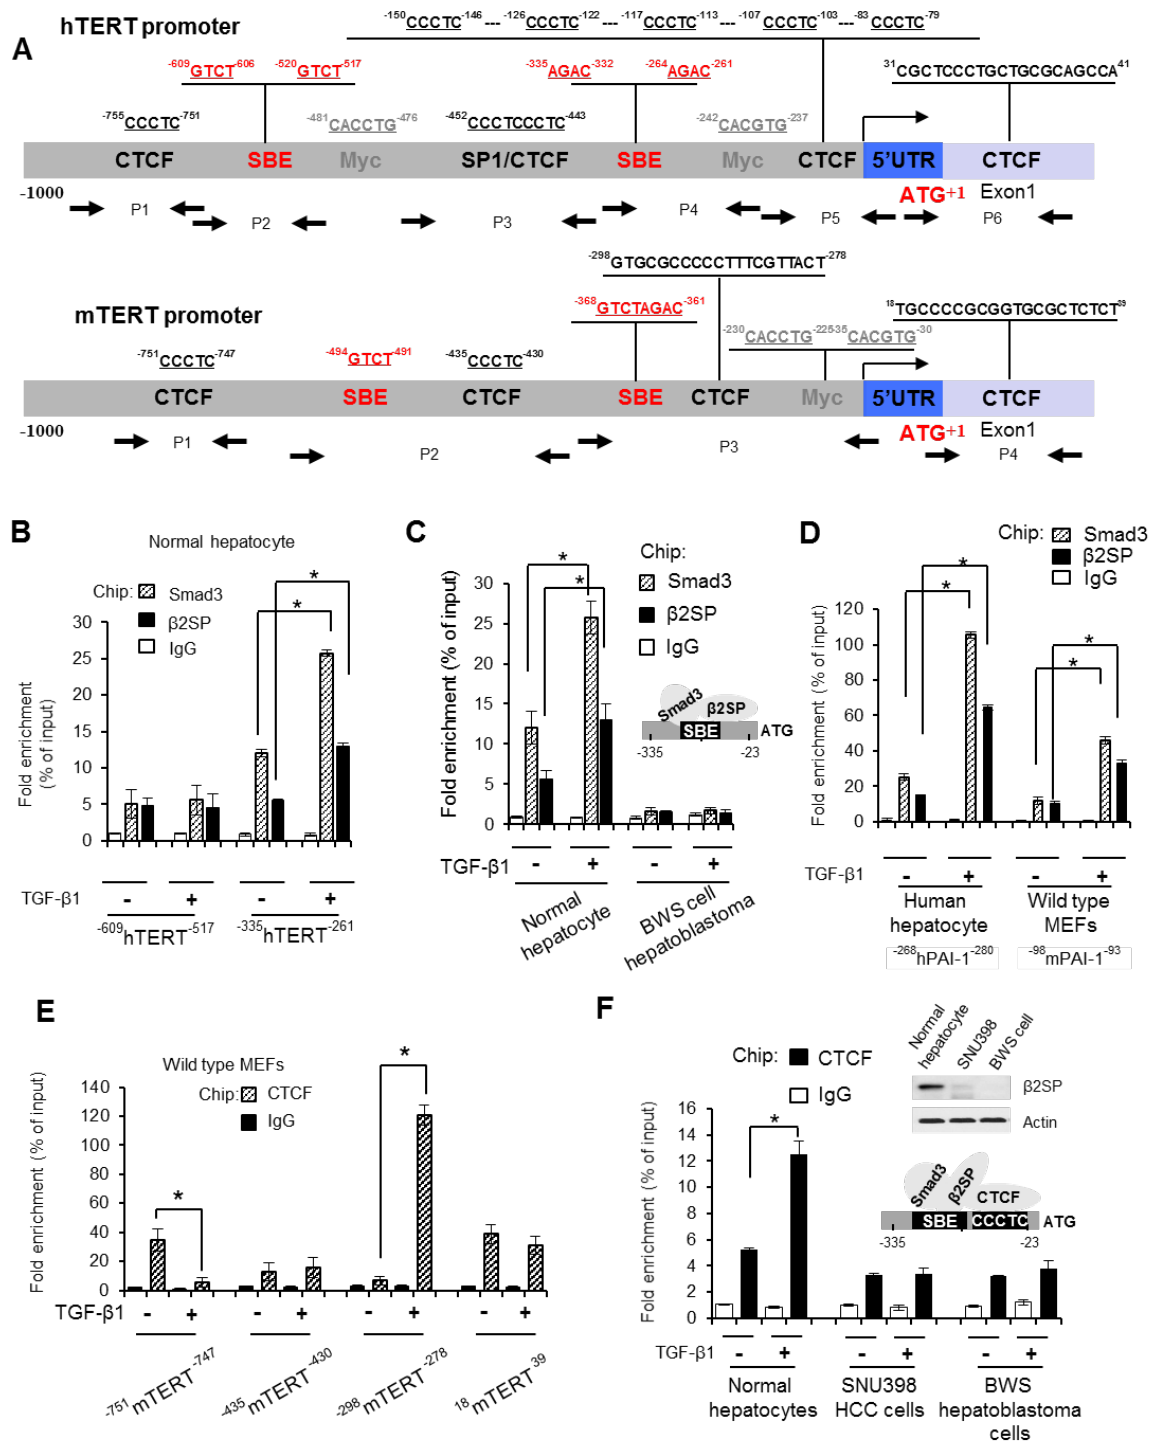

**Supplemental Figure 9.  $\beta$ 2SP, Smad3, and CTCF bind on *TERT* Promoter Region.** (A) Diagrammatic representation shows the potential SBE motifs, CTCF binding motifs, and Myc binding motifs on the human or mouse *TERT* promoter-exon1 region. (B) TGF- $\beta$  increases  $\beta$ 2SP/Smad3 binding activities on the sites ( $^{-335}\text{hTERT}^{-261}$  but not  $^{-609}\text{hTERT}^{-517}$ ) on human *TERT* promoter region. Genomic DNA was isolated from normal hepatocytes treated with TGF- $\beta$ 1 (200 pM) for 2 h. (C) TGF- $\beta$ 1 treatment increases  $\beta$ 2SP and SMAD3 binding on the *TERT* promoter in normal hepatocytes but not in BWS KvDMR+T hepatoblastoma cells. The cells were treated with TGF- $\beta$ 1 for 2 h. (D) TGF- $\beta$ 1 increases  $\beta$ 2SP/Smad3 binding activities on human and mouse *PAI-1* promoter. Genomic DNA was isolated from normal hepatocytes and wild type MEFs. ChIP assays were performed and enrichment of  $\beta$ 2SP or Smad3 transcripts was measured by quantitative PCR for (B) to (D). (E) TGF- $\beta$  increases CTCF binding activities on the sites ( $^{-298}\text{GTGCGCCCCCTTTCGTTAT}^{-278}$ , but not on  $^{-751}\text{CCCTC}^{-747}$  or on  $^{-435}\text{CCCTC}^{-430}$ ) on mouse *TERT* promoter region. ChIP assays were performed to detect the binding activity of CTCF on the mouse *TERT* promoter region. Genomic DNA was isolated from wild type MEFs treated with TGF- $\beta$ 1. (F) Binding ability of CTCF on *hTERT* promoter region is  $\beta$ 2SP dependent. Normal human hepatocytes or SNU398 or BWS KvDMR+T cells were treated with TGF- $\beta$ 1 for 2 h and ChIP assays were performed. Enrichment of CTCF transcripts was measured by quantitative PCR. Error bars are shown as standard deviations. Each result shown is representative of three independent experiments (B-F) \*:  $P < 0.001$ , one-way ANOVA with post-hoc Bonferroni test.

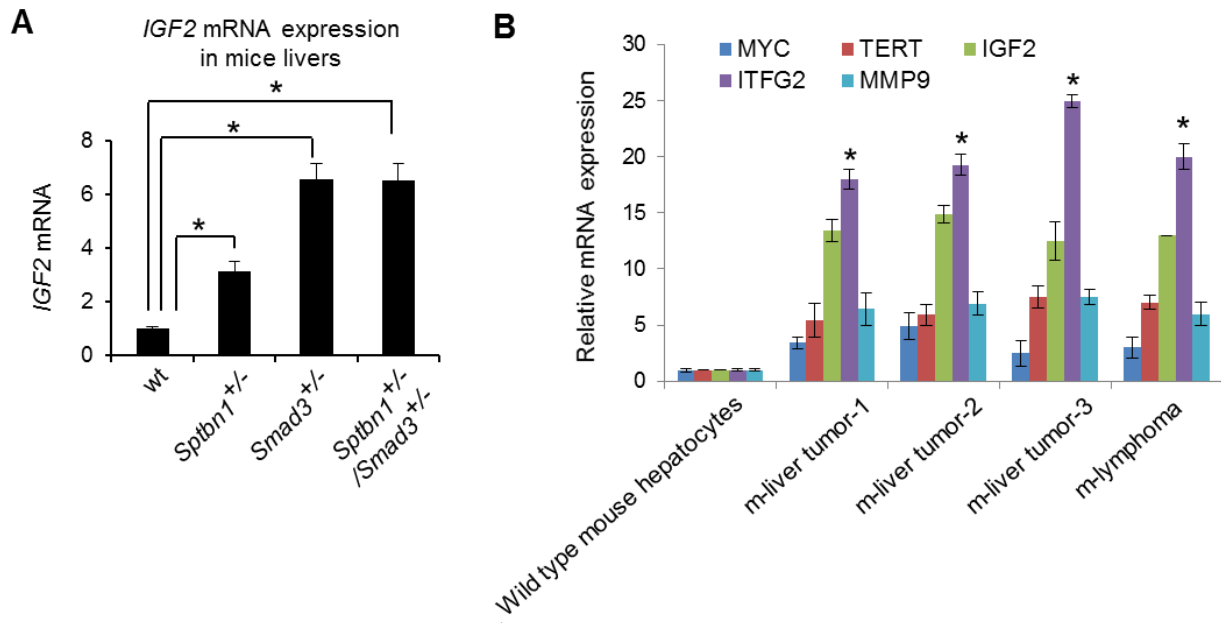

**Supplemental Figure 10. Increased levels of IGF2 in livers and tumors in *Sptbn1*<sup>+/-</sup>/*Smad3*<sup>+/-</sup> mice.** (A) Increased mRNA expressions of *IGF2* in *Sptbn1*<sup>+/-</sup>/*Smad3*<sup>+/-</sup>, *Smad3*<sup>+/-</sup>, and *Sptbn1*<sup>+/-</sup> mouse livers. (B) Increased mRNA expressions of c-Myc, TERT, IGF2, ITFG2 and MMP9 in mouse tumor cell lines. 4 cell lines were established from individual tumors (three hepatocarcinomas and one lymphoma) in *Sptbn1*<sup>+/-</sup>/*Smad3*<sup>+/-</sup> mice. Results are the average of three independent experiments and are presented as mean ± SD (A and B). \*:  $P < 0.001$ , versus wild type mouse hepatocytes or wild type MEFs, one-way ANOVA with post-hoc Bonferroni test.

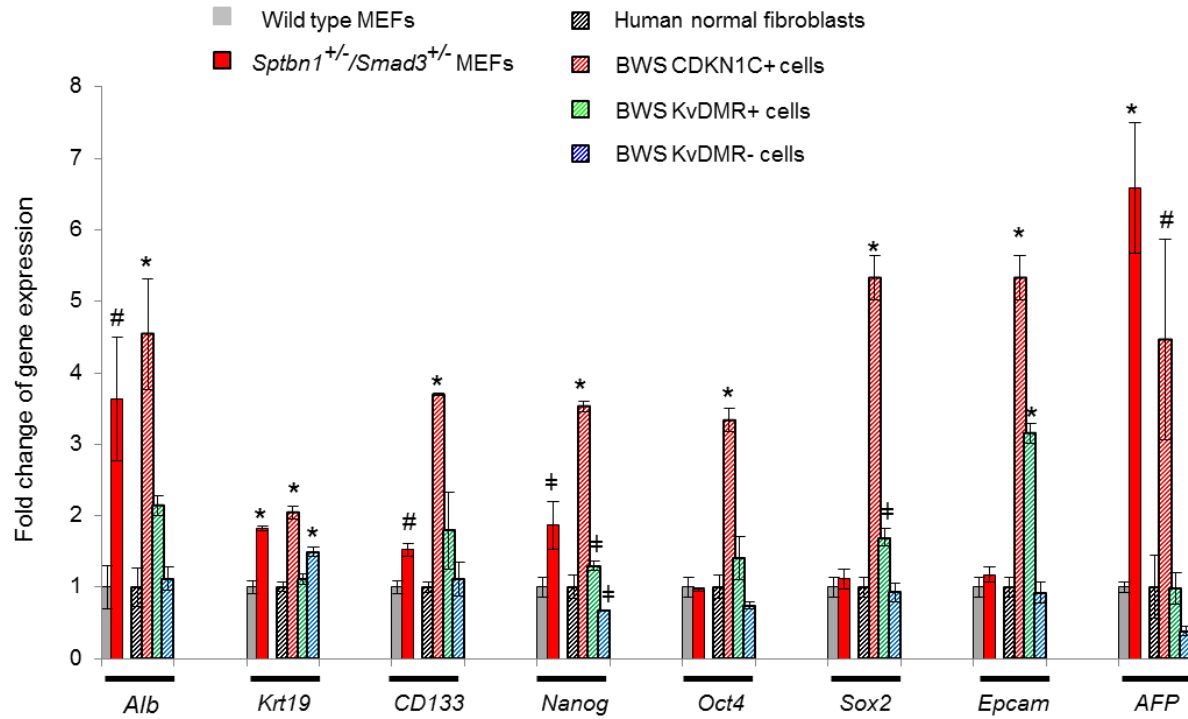

**Supplemental Figure 11.** Increased mRNA expression levels of stemness genes in MEFs and BWS cell lines. Q-PCR was performed to detect gene expression. Error bars are shown as standard deviations. Results are the average of three independent experiments and are presented as mean  $\pm$  SD. ‡:  $P < 0.05$ , #:  $P < 0.01$ , \*:  $P < 0.001$ , versus wild type MEFs (Student's t-test) or human normal fibroblasts (one-way ANOVA with post-hoc Bonferroni test).

**Supplemental Table 1. Classification of tumors in *Sptbn1*<sup>+/-</sup>/*Smad3*<sup>+/-</sup>, *Sptbn1*<sup>+/-</sup> and *Smad3*<sup>+/-</sup> mice.**

| Site             | Tumor Categories         | <i>Sptbn1</i> <sup>+/-</sup> / <i>Smad3</i> <sup>+/-</sup> |               | <i>Sptbn1</i> <sup>+/-</sup> |               | <i>Smad3</i> <sup>+/-</sup> |               |
|------------------|--------------------------|------------------------------------------------------------|---------------|------------------------------|---------------|-----------------------------|---------------|
|                  |                          | No. of mice                                                | Incidence (%) | No. of mice                  | Incidence (%) | No. of mice                 | Incidence (%) |
| Small Intestine  | Adenocarcinoma           | 5                                                          | 55.56         | 2                            | 4.65          | 0                           | 0             |
| Liver            | Hepatocellular Carcinoma | 5                                                          | 55.56         | 16                           | 37.21         | 1                           | 3.33          |
| Pancreas         | Adenocarcinoma           | 1                                                          | 11.11         | 0                            | 0.00          | 0                           | 0             |
| Head & Neck      | Squamous Cell Carcinoma  | 1                                                          | 11.11         | 0                            | 0.00          | 0                           | 0             |
| Lung             | Adenocarcinoma           | 5                                                          | 55.56         | 2                            | 4.65          | 1                           | 3.33          |
| Colon            | Adenocarcinoma           | 2                                                          | 22.22         | 1                            | 2.33          | 0                           | 0             |
| Thymus           | Thymoma                  | 2                                                          | 22.22         | 0                            | 0.00          | 0                           | 0             |
| Mediastinal Mass | Sarcoma                  | 2                                                          | 22.22         | 1                            | 2.33          | 0                           | 0             |
| Spleen           | Lymphoma                 | 1                                                          | 11.11         | 2                            | 4.65          | 1                           | 3.33          |
| Kidney           | Clear Cell Carcinoma     | 2                                                          | 22.22         | 3                            | 6.98          | 0                           | 0             |
| Adrenal          | Adrenocortical Carcinoma | 2                                                          | 22.22         | 0                            | 0.00          | 0                           | 0             |
| Skin             | Squamous Cell Carcinoma  | 1                                                          | 11.11         | 0                            | 0.00          | 0                           | 0             |
| Breast           | Adenoma                  | 2                                                          | 22.22         | 1                            | 2.33          | 0                           | 0             |
| Lacrimal Gland   | Adenocarcinoma           | 1                                                          | 11.11         | 0                            | 0.00          | 0                           | 0             |
| Optic Nerve      | Glioma                   | 1                                                          | 11.11         | 0                            | 0.00          | 0                           | 0             |

Total *Sptbn1*<sup>+/-</sup>/*Smad3*<sup>+/-</sup> mice, n=15; total mice *Sptbn1*<sup>+/-</sup>/*Smad3*<sup>+/-</sup> with tumors, n=11; mice with multiple tumors, n=9.

Total *Sptbn1*<sup>+/-</sup> mice n=43; total mice *Sptbn1*<sup>+/-</sup> with tumors, n=19; mice with multiple tumors, n=4.

Total *Smad3*<sup>+/-</sup> mice n=30; total mice *Smad3*<sup>+/-</sup> with tumors, n=3; mice with multiple tumors n=0.

**Supplemental Table 2. Sporadic tumor development in *Sptbn1*<sup>+/-</sup>/*Smad3*<sup>+/-</sup>, *Sptbn1*<sup>+/-</sup> and *Smad3*<sup>+/-</sup> mice.**

| Genotype                                                   | Mouse number | Gender        | Thymoma | Head & Neck cancer | Glioma | Lacrimal gland cancer | Skin cancer | Adrenocortical carcinoma | Pancreatic cancer | Kidney cancer | Sarcoma | Breast cancer | Colon adenocarcinoma | Small Intestine cancer | Lymphoma | Lung cancer | Hepatocellular carcinoma |
|------------------------------------------------------------|--------------|---------------|---------|--------------------|--------|-----------------------|-------------|--------------------------|-------------------|---------------|---------|---------------|----------------------|------------------------|----------|-------------|--------------------------|
| <i>Sptbn1</i> <sup>+/-</sup> / <i>Smad3</i> <sup>+/-</sup> | 1            | F             |         | +                  | +      |                       |             |                          | +                 |               |         |               |                      | +                      |          | +           | +                        |
|                                                            | 2            | F             |         |                    |        |                       |             |                          |                   |               |         |               | +                    |                        |          | +           | +                        |
|                                                            | 3            | M             | +       |                    |        | +                     |             |                          |                   |               |         |               |                      | +                      |          |             | +                        |
|                                                            | 4            | M             |         |                    |        |                       |             |                          |                   |               | +       |               |                      | +                      |          |             | +                        |
|                                                            | 5            | M             |         | +                  |        |                       | +           |                          |                   |               |         |               |                      | +                      |          |             | +                        |
|                                                            | 6            | F             | +       |                    |        |                       |             |                          |                   |               |         | +             |                      | +                      |          | +           |                          |
|                                                            | 7            | M             |         |                    |        |                       |             | +                        |                   | +             |         |               |                      |                        |          | +           |                          |
|                                                            | 8            | F             |         |                    |        |                       |             |                          |                   |               |         | +             |                      |                        |          | +           |                          |
|                                                            | 9            | F             |         |                    |        |                       |             | +                        |                   | +             |         |               | +                    |                        |          |             |                          |
|                                                            | 10           | M             |         |                    |        |                       |             |                          |                   |               |         |               |                      |                        | +        |             |                          |
|                                                            | 11           | M             |         |                    |        |                       |             |                          |                   |               | +       |               |                      |                        |          |             |                          |
|                                                            | 12-15*       | F:2<br>M:2    |         |                    |        |                       |             |                          |                   |               |         |               |                      |                        |          |             |                          |
| <i>Sptbn1</i> <sup>+/-</sup>                               | 1            | M             |         |                    |        |                       |             |                          |                   |               |         |               |                      | +                      | +        | +           | +                        |
|                                                            | 2            | F             |         |                    |        |                       |             |                          |                   |               |         |               |                      | +                      |          |             | +                        |
|                                                            | 3            | M             |         |                    |        |                       |             |                          |                   | +             | +       |               | +                    |                        |          |             | +                        |
|                                                            | 4            | M             |         |                    |        |                       |             |                          |                   |               |         |               |                      |                        |          |             | +                        |
|                                                            | 5            | M             |         |                    |        |                       |             |                          |                   |               |         |               |                      |                        |          |             | +                        |
|                                                            | 7            | F             |         |                    |        |                       |             |                          |                   |               |         |               |                      |                        |          |             | +                        |
|                                                            | 7            | F             |         |                    |        |                       |             |                          |                   |               |         |               |                      |                        |          |             | +                        |
|                                                            | 8            | F             |         |                    |        |                       |             |                          |                   |               |         |               |                      |                        |          |             | +                        |
|                                                            | 9            | F             |         |                    |        |                       |             |                          |                   |               |         |               |                      |                        |          |             | +                        |
|                                                            | 10           | M             |         |                    |        |                       |             |                          |                   |               |         |               |                      |                        |          |             | +                        |
|                                                            | 11           | F             |         |                    |        |                       |             |                          |                   |               |         |               |                      |                        |          |             | +                        |
|                                                            | 12           | M             |         |                    |        |                       |             |                          |                   |               |         |               |                      |                        |          |             | +                        |
|                                                            | 13           | F             |         |                    |        |                       |             |                          |                   |               |         |               |                      |                        |          |             | +                        |
|                                                            | 14           | M             |         |                    |        |                       |             |                          |                   |               |         |               |                      |                        |          |             | +                        |
|                                                            | 15           | M             |         |                    |        |                       |             |                          |                   |               |         |               |                      |                        |          |             | +                        |
|                                                            | 16           | M             |         |                    |        |                       |             |                          |                   |               |         |               |                      |                        |          |             | +                        |
|                                                            | 17           | F             |         |                    |        |                       |             |                          |                   | +             |         | +             |                      |                        |          | +           |                          |
|                                                            | 18           | M             |         |                    |        |                       |             |                          |                   | +             |         |               |                      |                        |          |             |                          |
|                                                            | 19           | F             |         |                    |        |                       |             |                          |                   |               |         |               |                      |                        | +        |             |                          |
| <i>Smad3</i> <sup>+/-</sup>                                | 20-43*       | F:10<br>M: 14 |         |                    |        |                       |             |                          |                   |               |         |               |                      |                        |          |             |                          |
|                                                            | 1            | M             |         |                    |        |                       |             |                          |                   |               |         |               |                      |                        |          |             | +                        |
|                                                            | 2            | F             |         |                    |        |                       |             |                          |                   |               |         |               |                      |                        |          | +           |                          |
|                                                            | 3            | F             |         |                    |        |                       |             |                          |                   |               |         |               |                      |                        | +        |             |                          |
|                                                            | 4-30*        | F:14<br>M:13  |         |                    |        |                       |             |                          |                   |               |         |               |                      |                        |          |             |                          |

\*: Mice without tumor.

**Supplemental Table 3. Somatic mutations of Smad3 and  $\beta$ 2SP identified on COSMIC and LIHC TCGA.**

| COSMIC    |           |             |               |                             |                                                  |                     |
|-----------|-----------|-------------|---------------|-----------------------------|--------------------------------------------------|---------------------|
| Gene Name | Sample ID | AA Mutation | CDS Mutation  | Primary Tissue              | Histology                                        | Somatic Status      |
| SMAD3     | 1688022   | p.A349S     | c.1045G>T     | Autonomic ganglia           | Neuroblastoma                                    | Confirmed Somatic   |
| SMAD3     | 1735399   | p.V331I     | c.991G>A      | Central nervous system      | Primitive neuroectodermal tumour-medulloblastoma | Confirmed Somatic   |
| SMAD3     | 1783454   | p.R268C     | c.802C>T      | Endometrium                 | Carcinoma                                        | Confirmed Somatic   |
| SMAD3     | 1783371   | p.R295W     | c.883C>T      | Endometrium                 | Carcinoma                                        | Confirmed Somatic   |
| SMAD3     | 1783520   | p.V331I     | c.991G>A      | Endometrium                 | Carcinoma                                        | Confirmed Somatic   |
| SMAD3     | 1783419   | p.S425Y     | c.1274C>A     | Endometrium                 | Carcinoma                                        | Confirmed Somatic   |
| SMAD3     | 1897529   | p.Y226fs*1  | c.676_677insA | Haematopoietic and lymphoid | Lymphoid neoplasm                                | Confirmed Somatic   |
| SMAD3     | 1766754   | p.R90H      | c.269G>A      | Large intestine             | Carcinoma                                        | Confirmed Somatic   |
| SMAD3     | 1651648   | p.E178D     | c.534G>T      | Large intestine             | Carcinoma                                        | Confirmed Somatic   |
| SMAD3     | 1651567   | p.Y237C     | c.710A>G      | Large intestine             | Carcinoma                                        | Confirmed Somatic   |
| SMAD3     | 1766767   | p.N276I     | c.827A>T      | Large intestine             | Carcinoma                                        | Confirmed Somatic   |
| SMAD3     | 1766809   | p.R287W     | c.859C>T      | Large intestine             | Carcinoma                                        | Confirmed Somatic   |
| SMAD3     | 1766754   | p.R368Q     | c.1103G>A     | Large intestine             | Carcinoma                                        | Confirmed Somatic   |
| SMAD3     | 1766776   | p.R373H     | c.1118G>A     | Large intestine             | Carcinoma                                        | Confirmed Somatic   |
| SMAD3     | 1651670   | p.G379A     | c.1136G>C     | Large intestine             | Carcinoma                                        | Confirmed Somatic   |
| SMAD3     | 1235044   | p.P393L     | c.1178C>T     | Large intestine             | Carcinoma                                        | Confirmed Somatic   |
| SMAD3     | 1651671   | p.P393L     | c.1178C>T     | Large intestine             | Carcinoma                                        | Previously Reported |
| SMAD3     | 2067140   | p.R142H     | c.425G>A      | Liver                       | Carcinoma                                        | Confirmed Somatic   |
| SMAD3     | 1863736   | p.E239V     | c.716A>T      | Lung                        | Carcinoma                                        | Confirmed Somatic   |
| SMAD3     | 1780235   | p.R243C     | c.727C>T      | Lung                        | Carcinoma                                        | Confirmed Somatic   |
| SMAD3     | 1780064   | p.P253S     | c.757C>T      | Lung                        | Carcinoma                                        | Confirmed Somatic   |
| SMAD3     | 1780171   | p.R268H     | c.803G>A      | Lung                        | Carcinoma                                        | Confirmed Somatic   |
| SMAD3     | 1860019   | p.E149G     | c.446A>G      | Oesophagus                  | Carcinoma                                        | Confirmed Somatic   |
| SMAD3     | 1434856   | p.S423G     | c.1267A>G     | Ovary                       | Carcinoma                                        | Confirmed Somatic   |
| SMAD3     | 1473141   | p.S422F     | c.1265C>T     | Pancreas                    | NS                                               | Confirmed Somatic   |
| SMAD3     | 1797209   | p.A329S     | c.985G>T      | Prostate                    | Carcinoma                                        | Confirmed Somatic   |
| SMAD3     | 2013572   | p.R373C     | c.1117C>T     | Skin                        | Malignant melanoma                               | Confirmed Somatic   |

|        |         |          |           |                                 |                   |                        |
|--------|---------|----------|-----------|---------------------------------|-------------------|------------------------|
| SMAD3  | 1542864 | p.S425C  | c.1274C>G | Upper<br>aerodigestive<br>tract | Carcinoma         | Confirmed<br>Somatic   |
| SPTBN1 | 1659943 | p.A682V  | c.2045C>T | Breast                          | Carcinoma         | Confirmed<br>Somatic   |
| SPTBN1 | 1659947 | p.H1760P | c.5279A>C | Breast                          | Carcinoma         | Confirmed<br>Somatic   |
| SPTBN1 | 1779256 | p.E1646K | c.4936G>A | Breast                          | Carcinoma         | Confirmed<br>Somatic   |
| SPTBN1 | 1779322 | p.R42W   | c.124C>T  | Breast                          | Carcinoma         | Confirmed<br>Somatic   |
| SPTBN1 | 1430345 | p.R107*  | c.319C>T  | Breast                          | Carcinoma         | Confirmed<br>Somatic   |
| SPTBN1 | 1783319 | p.A2326T | c.6976G>A | Endometrium                     | Carcinoma         | Confirmed<br>Somatic   |
| SPTBN1 | 1783328 | p.R1258G | c.3772A>G | Endometrium                     | Carcinoma         | Confirmed<br>Somatic   |
| SPTBN1 | 1783387 | p.D1813N | c.5437G>A | Endometrium                     | Carcinoma         | Confirmed<br>Somatic   |
| SPTBN1 | 1783412 | p.E475K  | c.1423G>A | Endometrium                     | Carcinoma         | Confirmed<br>Somatic   |
| SPTBN1 | 1783443 | p.A395T  | c.1183G>A | Endometrium                     | Carcinoma         | Confirmed<br>Somatic   |
| SPTBN1 | 1783467 | p.V1946I | c.5836G>A | Endometrium                     | Carcinoma         | Confirmed<br>Somatic   |
| SPTBN1 | 1783524 | p.F2236I | c.6706T>A | Endometrium                     | Carcinoma         | Confirmed<br>Somatic   |
| SPTBN1 | 1945136 | p.G246S  | c.736G>A  | Haematopoietic<br>and lymphoid  | Lymphoid neoplasm | Confirmed<br>Somatic   |
| SPTBN1 | 1945111 | p.L1973I | c.5917C>A | Haematopoietic<br>and lymphoid  | Lymphoid neoplasm | Confirmed<br>Somatic   |
| SPTBN1 | 1945150 | p.T2320M | c.6959C>T | Haematopoietic<br>and lymphoid  | Lymphoid neoplasm | Confirmed<br>Somatic   |
| SPTBN1 | 1945173 | p.K497R  | c.1490A>G | Haematopoietic<br>and lymphoid  | Lymphoid neoplasm | Confirmed<br>Somatic   |
| SPTBN1 | 1945181 | p.K401T  | c.1202A>C | Haematopoietic<br>and lymphoid  | Lymphoid neoplasm | Confirmed<br>Somatic   |
| SPTBN1 | 1945190 | p.N1226S | c.3677A>G | Haematopoietic<br>and lymphoid  | Lymphoid neoplasm | Confirmed<br>Somatic   |
| SPTBN1 | 1998437 | p.V1860M | c.5578G>A | Haematopoietic<br>and lymphoid  | Lymphoid neoplasm | Confirmed<br>Somatic   |
| SPTBN1 | 1630874 | p.R681W  | c.2041C>T | Haematopoietic<br>and lymphoid  | Lymphoid neoplasm | Confirmed<br>Somatic   |
| SPTBN1 | 1998456 | p.F694Y  | c.2081T>A | Haematopoietic<br>and lymphoid  | Lymphoid neoplasm | Confirmed<br>Somatic   |
| SPTBN1 | 1921467 | p.R681W  | c.2041C>T | Haematopoietic<br>and lymphoid  | Lymphoid neoplasm | Previously<br>Reported |
| SPTBN1 | 1766747 | p.D161Y  | c.481G>T  | Large intestine                 | Carcinoma         | Confirmed<br>Somatic   |
| SPTBN1 | 1766747 | p.L2084S | c.6251T>C | Large intestine                 | Carcinoma         | Confirmed<br>Somatic   |
| SPTBN1 | 1766748 | p.H1634R | c.4901A>G | Large intestine                 | Carcinoma         | Confirmed<br>Somatic   |
| SPTBN1 | 1766750 | p.R384W  | c.1150C>T | Large intestine                 | Carcinoma         | Confirmed<br>Somatic   |
| SPTBN1 | 1766751 | p.A2240T | c.6718G>A | Large intestine                 | Carcinoma         | Confirmed<br>Somatic   |
| SPTBN1 | 1766769 | p.R913H  | c.2738G>A | Large intestine                 | Carcinoma         | Confirmed<br>Somatic   |
| SPTBN1 | 1766789 | p.R1375Q | c.4124G>A | Large intestine                 | Carcinoma         | Confirmed<br>Somatic   |
| SPTBN1 | 1766793 | p.W970R  | c.2908T>C | Large intestine                 | Carcinoma         | Confirmed<br>Somatic   |

| SPTBN1       | 1766805                      | p.Q1440H        | c.4320A>C               | Large intestine | Carcinoma          | Confirmed Somatic   |
|--------------|------------------------------|-----------------|-------------------------|-----------------|--------------------|---------------------|
| SPTBN1       | 1998441                      | p.R1739Q        | c.5216G>A               | Large intestine | Carcinoma          | Confirmed Somatic   |
| SPTBN1       | 1998483                      | p.N1527I        | c.4580A>T               | Large intestine | Carcinoma          | Confirmed Somatic   |
| SPTBN1       | 1998442                      | p.L1948F        | c.5842C>T               | Large intestine | Carcinoma          | Confirmed Somatic   |
| SPTBN1       | 1651542                      | p.E622A         | c.1865A>C               | Large intestine | Carcinoma          | Confirmed Somatic   |
| SPTBN1       | 1651648                      | p.E1533*        | c.4597G>T               | Large intestine | Carcinoma          | Confirmed Somatic   |
| SPTBN1       | 1651673                      | p.R107*         | c.319C>T                | Large intestine | Carcinoma          | Previously Reported |
| SPTBN1       | 2067095                      | p.S2245A        | c.6733T>G               | Liver           | Carcinoma          | Confirmed Somatic   |
| SPTBN1       | 2067170                      | p.L1355V        | c.4063C>G               | Liver           | Carcinoma          | Confirmed Somatic   |
| SPTBN1       | 1765225                      | p.K593fs*1<br>1 | c.1777_1781delAAGT<br>T | Lung            | Carcinoma          | Confirmed Somatic   |
| SPTBN1       | 1434855                      | p.I1636M        | c.4908C>G               | Ovary           | Carcinoma          | Confirmed Somatic   |
| SPTBN1       | 1474856                      | p.L962F         | c.2884C>T               | Ovary           | Carcinoma          | Confirmed Somatic   |
| SPTBN1       | 1475027                      | p.L1314*        | c.3941T>A               | Ovary           | Carcinoma          | Confirmed Somatic   |
| SPTBN1       | 2068114                      | p.R144W         | c.430C>T                | Pancreas        | Carcinoma          | Confirmed Somatic   |
| SPTBN1       | 1998469                      | p.M133T         | c.398T>C                | Prostate        | Carcinoma          | Confirmed Somatic   |
| SPTBN1       | 1604874                      | p.M526I         | c.1578G>A               | Skin            | Carcinoma          | Confirmed Somatic   |
| SPTBN1       | 1604872                      | p.R972Q         | c.2915G>A               | Skin            | Carcinoma          | Confirmed Somatic   |
| SPTBN1       | 2013568                      | p.R1915C        | c.5743C>T               | Skin            | Malignant melanoma | Confirmed Somatic   |
| SPTBN1       | 1673883                      | p.R1915C        | c.5743C>T               | Skin            | Malignant melanoma | Previously Reported |
| LIHC<br>TCGA |                              |                 |                         |                 |                    |                     |
| Gene Name    | Tumor_Sample_Barcode         | AA Change       | Chrom Change            | Primary Tissue  | Variant            | Mutation Status     |
| SMAD3        | TCGA-DD-A11C-01A-11D-A12Z-10 | p.F376L         | c.T1126C                | Liver           | Missense Mutation  | Somatic             |
| SMAD3        | TCGA-DD-A1EL-01A-11D-A152-10 | p.L42F          | c.C124T                 | Liver           | Missense Mutation  | Somatic             |
| SMAD3        | TCGA-DD-A39Y-01A-11D-A20W-10 | p.T392fs        | c.1175delC              | Liver           | Frame_Shift_Del    | Somatic             |
| SMAD3        | TCGA-G3-A6UC-01A-21D-A33K-10 | p.G25V          | c.G74T                  | Liver           | Missense Mutation  | Somatic             |
| SMAD3        | TCGA-RC-A6M4-01A-11D-A32G-10 | p.K333E         | c.A997G                 | Liver           | Missense Mutation  | Somatic             |
| SPTBN1       | TCGA-BW-A5NP-01A-11D-A27I-10 | p.N32Y          | c.A94T                  | Liver           | Missense Mutation  | Somatic             |
| SPTBN1       | TCGA-DD-A119-01A-11D-A12Z-10 | p.E33D          | c.G99T                  | Liver           | Missense Mutation  | Somatic             |
| SPTBN1       | TCGA-DD-A3A1-01A-11D-A20W-10 | p.L388R         | c.T1163G                | Liver           | Missense Mutation  | Somatic             |
| SPTBN1       | TCGA-FV-A3R2-01A-11D-A22F-10 | p.E489K         | c.G1465A                | Liver           | Missense Mutation  | Somatic             |
| SPTBN1       | TCGA-G3-A25Y-01A-11D-A16V-10 | p.G562C         | c.G1684T                | Liver           | Missense Mutation  | Somatic             |

| SPTBN1      | TCGA-FV-A4ZQ-01A-11D-A25V-10 | p.N1106S  | c.A3317G     | Liver          | Missense Mutation      | Somatic         |
|-------------|------------------------------|-----------|--------------|----------------|------------------------|-----------------|
| SPTBN1      | TCGA-DD-A1EH-01A-11D-A12Z-10 | p.R1141W  | c.C3421T     | Liver          | Missense Mutation      | Somatic         |
| SPTBN1      | TCGA-QA-A7B7-01A-11D-A32G-10 | p.A1220V  | c.C3659T     | Liver          | Missense Mutation      | Somatic         |
| SPTBN1      | TCGA-BC-A112-01A-11D-A12Z-10 | NA        | c.4495-2A>G  | Liver          | Splice_Site            | Somatic         |
| SPTBN1      | TCGA-UB-A7MB-01A-11D-A33Q-10 | p.A1645E  | c.C4934A     | Liver          | Missense Mutation      | Somatic         |
| SPTBN1      | TCGA-DD-A4NG-01A-11D-A27I-10 | p.L1783R  | c.T5348G     | Liver          | Missense Mutation      | Somatic         |
| SPTBN1      | TCGA-EP-A26S-01A-11D-A16V-10 | p.W653R   | c.T1957C     | Liver          | Missense Mutation      | Somatic         |
| MD Anderson |                              |           |              |                |                        |                 |
| Gene Name   | Tumor_Sample_Barcode         | AA Change | Chrom Change | Primary Tissue | Variant Classification | Mutation Status |
| SPTBN1      | 9194MDACC                    | p.D1089Y  | c.G3265T     | Liver          | Missense_Mutation      | Somatic         |

Supplemental Table 4. Mutual exclusivity of co-occurrence of SPTBN1 with SMAD2, SMAD3 or SMAD4 in TCGA dataset.\*

| Co-occur     | Cancer type                           | Cohort     | Gene A | Gene B | p-Value <sup>†</sup> | Log Odds Ratio | Association                                |
|--------------|---------------------------------------|------------|--------|--------|----------------------|----------------|--------------------------------------------|
| SPTBN1+SMAD2 | Colorectal Adenocarcinoma             | Genentech  | SPTBN1 | SMAD2  | 0.016 <sup>‡</sup>   | 2.501          | significant tendency towards co-occurrence |
|              |                                       | TCGA       | SPTBN1 | SMAD2  | 0.093                | 1.65           | association towards co-occurrence          |
|              | Stomach Adenocarcinoma                | TCGA       | SPTBN1 | SMAD2  | 0.444                | 0.659          | association towards co-occurrence          |
|              | Uterine Corpus Endometrioid Carcinoma | TCGA       | SPTBN1 | SMAD2  | 0.495                | 0.508          | association towards co-occurrence          |
| SPTBN1+SMAD3 | Cervical Squamous Cell Carcinoma      | TCGA       | SPTBN1 | SMAD3  | 0.001 <sup>‡</sup>   | >3             | significant tendency towards co-occurrence |
|              | Kidney Chromophobe                    | TCGA       | SPTBN1 | SMAD3  | 0.015 <sup>‡</sup>   | >3             | significant tendency towards co-occurrence |
|              | Colorectal Adenocarcinoma             | TCGA       | SPTBN1 | SMAD3  | 0.256                | 1.451          | association towards co-occurrence          |
|              | Head and Neck Squamous Cell Carcinoma | TCGA       | SPTBN1 | SMAD3  | 0.077                | >3             | association towards co-occurrence          |
|              | Nasopharyngeal Carcinoma              | Singapore  | SPTBN1 | SMAD3  | 0.036 <sup>‡</sup>   | >3             | significant tendency towards co-occurrence |
|              | Uterine Corpus Endometrioid Carcinoma | TCGA       | SPTBN1 | SMAD3  | 0.102                | 1.601          | association towards co-occurrence          |
| SPTBN1+SMAD4 | Cervical Squamous Cell Carcinoma      | TCGA       | SPTBN1 | SMAD4  | 0.964                | <-3            | association towards co-occurrence          |
|              | Colorectal Adenocarcinoma             | Genentech  | SPTBN1 | SMAD4  | 0.281                | 0.762          | association towards co-occurrence          |
|              | Stomach Adenocarcinoma                | Pfizer/UHK | SPTBN1 | SMAD4  | 0.144                | 2.543          | association towards co-occurrence          |
|              | Uterine Corpus Endometrioid Carcinoma | TCGA       | SPTBN1 | SMAD4  | 0.053                | 2.12           | association towards co-occurrence          |

\*: Analyzed by cBio portal complements existing tools (<http://cbioportal.org>).

<sup>†</sup>: Derived from Fisher Exact Text.

<sup>‡</sup>: p-Value < 0.05: significant tendency towards co-occurrence.

Log Odds Ratio > 0: association towards co-occurrence; Log Odds Ratio ≤ 0: association towards mutual exclusivity.

**Supplemental Table 5. Top 5 predicted activation and inactivation diseases/functions in MEFs.**

|               | <i>Sptbn1</i> <sup>+/-</sup> / <i>Smad3</i> <sup>+/-</sup> | z-score | <i>Sptbn</i> <sup>+/-</sup>        | z-score | <i>Sptbn1</i> <sup>-/-</sup>  | z-score | <i>Smad3</i> <sup>+/-</sup>   | z-score |
|---------------|------------------------------------------------------------|---------|------------------------------------|---------|-------------------------------|---------|-------------------------------|---------|
| Activation:   | Cell movement                                              | 3.758   | Organism death                     | 2.651   | Hypertrophy                   | 2.425   | Organism death                | 3.579   |
|               | Leukocyte migration                                        | 3.46    | Hypertrophy of heart               | 2.405   | Size of infarct               | 2.401   | Synthesis of polysaccharide   | 2.983   |
|               | Migration of cells                                         | 3.422   | Cardiac fibrosis                   | 2.126   | Size of lesion                | 2.209   | Metabolism of carbohydrate    | 2.718   |
|               | Cell movement of leukocytes                                | 3.197   | Abnormal morphology of body cavity | 1.982   | Lesion formation              | 2.209   | Blood pressure                | 2.351   |
|               | Chemotaxis of cells                                        | 3.073   | Quantity of vitamin                | 1.98    | Heart Disease                 | 2.025   | Multiple congenital anomalies | 1.982   |
|               |                                                            |         |                                    |         |                               |         |                               |         |
| Inactivation: | Organism death                                             | -3.816  | Activation of blood cells          | -3.89   | Damage of connective tissue   | -2.433  | Size of body                  | -3.388  |
|               | Infection of mammalia                                      | -2.016  | Activation of leukocytes           | -3.674  | Accumulation of phagocytes    | -2.348  | Metabolism of terpenoid       | -2.781  |
|               | Parasitic infection                                        | -1.969  | Activation of cells                | -3.659  | Damage of cartilage tissue    | -2.219  | Analgesia                     | -2.578  |
|               | Inflammation of organ                                      | -1.421  | Activation of myeloid cells        | -3.238  | Accumulation of myeloid cells | -1.924  | Antinociception               | -2.57   |
|               | Nephritis                                                  | -1.406  | Adhesion of blood cells            | -3.213  | Cell movement of macrophages  | -1.626  | Infiltration of cells         | -2.437  |

**Supplemental Table 6. Top 5 predicted activation and inactivation diseases/functions in BWS cell lines.**

|               | CDKN1C+                                 | z-score | KvDMR+                                           | z-score | KvDMR-                                           | z-score |
|---------------|-----------------------------------------|---------|--------------------------------------------------|---------|--------------------------------------------------|---------|
| Activation:   | Organism death                          | 9.611   | Fertility                                        | 3.209   | <b>Size of body</b>                              | 2.428   |
|               | Growth failure                          | 5.509   | Proliferation of embryonic cells                 | 2.263   | Proliferation of embryonic cells                 | 2.244   |
|               | Anemia                                  | 3.911   | Synthesis of DNA                                 | 2.233   | Lymphangiogenesis                                | 1.969   |
|               | Heart disease                           | 3.709   | Cell surface receptor linked signal transduction | 2.156   | Cell surface receptor linked signal transduction | 1.941   |
|               | <b>Tumorigenesis of malignant tumor</b> | 3.273   | <b>Size of body</b>                              | 1.93    | Synthesis of DNA                                 | 1.898   |
|               |                                         |         |                                                  |         |                                                  |         |
| Inactivation: | Size of body                            | -6.418  | Organism death                                   | -3.226  | Organism death                                   | -4.163  |
|               | Cell movement                           | -5.757  | Morphology of digestive system                   | -2.771  | Perinatal death                                  | -2.955  |
|               | Viral infection                         | -5.111  | Adhesion of blood cells                          | -2.478  | Damage of lung                                   | -2.954  |
|               | Cell viability                          | -5.062  | Perinatal death                                  | -2.464  | Adhesion of blood cells                          | -2.548  |
|               | Cell survival                           | -4.913  | Congenital anomaly of musculoskeletal system     | -2.423  | Hypoplasia                                       | -2.507  |
